# Supplementary material for: Inferring gene expression from ribosomal promoter sequences, a crowdsourcing approach
Source: HighWire-hosted journal article supplement (doi:10.1101/gr.157420.113), 2013-08-15
Supplement: Supplemental_TableS3.docx [file Supplemental_TableS3.docx]

| DNA Feature | Description |
| --- | --- |
| Mononucleotides | Frequency of G |
| Dinucleotides | Frequency of GT |
| Trinucleotides | Frequency of 6 trinucleotides |
| Tetranucleotides | Frequency 12 tetranucleotides |
| T-tracts | Length of T-tracts |
| TA-tracts | Length of TA-tracts |
| DNA deformability | Negatively correlated to activity |
| Transcription Factors Rap1,Fhl1,Sfp1 | Probability of Transcription Factor binding |

**Summary of selected features for SVM Model combining Team FIrST features and Biological Features derived from Zeevi *et al***

*Note: All features were constructed from only the 100bp upstream of the translation start site

**Weights (not support vectors) showing relative importance of each feature in SVM Model**

- 0.3431 * (normalized) G

+ 0.2339 * (normalized) GT

- 0.1486 * (normalized) ATA

+ 0.0461 * (normalized) ACA

- 0.2258 * (normalized) ACC

- 0.156 * (normalized) TGA

+ 0.1594 * (normalized) TGC

- 0.0027 * (normalized) CCC

+ 0.3171 * (normalized) ACCC

- 0.1323 * (normalized) AGTC

+ 0.0089 * (normalized) AGGT

- 0.1435 * (normalized) TATT

+ 0.2224 * (normalized) TCCT

- 0.1176 * (normalized) CCTA

+ 0.1917 * (normalized) CGAG

- 0.1013 * (normalized) CGTC

- 0.1184 * (normalized) GAAA

- 0.0521 * (normalized) GTGT

- 0.0135 * (normalized) GCCA

- 0.1262 * (normalized) GGTC

+ 0.1721 * (normalized) T-stretch Length Median

- 0.2004 * (normalized) TA-stretch Length Mean

- 0.0988 * (normalized) Average Deformability

+ 0.7332
