# Supplementary material for: Inferring gene expression from ribosomal promoter sequences, a crowdsourcing approach
Source: HighWire-hosted journal article supplement (doi:10.1101/gr.157420.113), 2013-08-15
Supplement: Supplemental_TableS5.xlsx [file Supplemental_TableS5.xlsx]

## Sheet: Sheet1
Promoter_Name	Original_Promoter_ORF	Mutated_Site	Promoter_Sequence
RPL10_M1	YLR075W	Random	TCACTTGTCTGTGTGTTTAACTGCCTTTCAATTCACCTCATCTCATCTCCCGCTACTTTCCATATATAAAAGCAAAATTAATTTGCTTTTTCCCCTGTCAGTATAAAAAAATTTTCCGCAGGATATAGAAAAAAAAGAAATGAAATTATAGTAGCGGTTATTTCCGTGGGGTGCTTTTTTACACCTGTACATCTTTTCCCTCCGTACATTTTTTTATTTTTTTTTTTGGTTTTTTTTTTTTCGATATTTTTCCCTCCGAAACTAGTTAGCACAATAATGCTGACTAAGGAAACTTTTCATCTCAGAATTGATGGTCAGTTTGGTTTCTCTAGAGAATAGTTTATAAAAAGATGTTGATGTGGAGCAACCATTTATACATCCTTTCCGCAAGTGCTTTTG…
RPL10_M2	YLR075W	Random	TCACTCGTCTGTGTGTTTAACTGCCTTTCAATTCACCTCATCTCATCTCCCGCTACTTTCCATATATAAAAGCAAAATTAATTTGCTTTTTCCCCTGTCAGTATAAAAAAATTTTCCGCAGGATATAGAAAAAAAAGAAATGAAATTATAGTAGCGGTTATTTCCGTGGGGTGCTTTTTTACACCTGTACATCTTTTCCCTCCGTACATTTTTTTTATTTTTTTTTTTGGTTTTTTTTTTTCGATATTTTTCCCTCCGAAACTAGTTAGCACAATAATGCTGACTAAGGAAACTTTTCATCTCAGAATTGATGGTCAGTTTGGTTTCTCTAGAGAATAGTTTATAAAAAGATGTTGATGTGGAGCAACCATTTATACATCCTTTCCGCAAGTGCTTTTG…
RPL10_M3	YLR075W	TATA	TCACTTGTCTGTGTGTTTAACTGCCTTTCAATTCACCTCATCTCATCTCCCGCTACTTTCCATATATAAAAGCAAAATTAATTTGCTTTTTCCCCTGTCAGTATAAAAAAATTTTCCGCAGGATATAGAAAAAAAAGAAATGAAATTATAGTAGCGGTTATTTCCGTGGGGTGCTTTTTTACACCTGTACATCTTTTCCCTCCGTACATTTTTTTTATTTTTTTTTTTGGTTTTTTTTTTTTCGATATTTTTCCCTCCGAAACTAGTTAGCACAATAATGCTGACTAAGGAAACTTTTCATCTCAGAATTGATGGTCAGTTTGGTTTCTCTAGAGAATAGTTAATTAAAAGATGTTGATGTGGAGCAACCATTTATACATCCTTTCCGCAAGTGCTTTT…
RPL10_M4	YLR075W	Nucleosome_Disfavoring_Sequence	TCACTTGTCTGTGTGTTTAACTGCCTTTCAATTCACCTCATCTCATCTCCCGCTACTTTCCATATATAAAAGCAAAATTAATTTGCTTTTTCCCCTGTCAGTATAAAAAAATTTTCCGCAGGATATAGAAAAAAAAGAAATGAAATTATAGTAGCGGTTATTTCCGTGGGGTGCTTTTTTACACCTGTACATCTTTTCCCTCCGTACATTTGTGTGCTGCCGTCTTTCGGGTCTTTTCCGCGATATTTTTCCCTCCGAAACTAGTTAGCACAATAATGCTGACTAAGGAAACTTTTCATCTCAGAATTGATGGTCAGTTTGGTTTCTCTAGAGAATAGTTTATAAAAAGATGTTGATGTGGAGCAACCATTTATACATCCTTTCCGCAAGTGCTTTTGG…
RPL13A_Mut1	YLR075W	Random	TCACTTGTCTGTGTGTTTAACTGCCTTTCAATTCACCTCATCTCATCTCCCGCTACTTTCCATATATAAAAGCAAAATTAATTTGCTTTTTCCCCTGTCAGTATAAAAAAATTTTCCGCAGGATATAGAAAAAAAAGAAATGAAATTATAGTAGCGGTTATTTCCGTGGGGTGCTTTTTTACACCTGTACATCTTTTCCCTCCGTACATTTTTTTATTTTTTTTTTTGGTTTTTTTTTTTTCGATATTTTTCCCTCCGAAACTAGTTAGCACAATAATGCTGACTAAGGAAACTTTTCATCTCAGAATTGATGGTCAGTTTGGTTTCTCTAGAGAATAGTTTATAAAAAGATGTTGATGTGGAGCAACCATTTATACATCCTTTCCGCAAGTGCTTTTG…
RPL14B_Mut1	YLR075W	Random	TCACTCGTCTGTGTGTTTAACTGCCTTTCAATTCACCTCATCTCATCTCCCGCTACTTTCCATATATAAAAGCAAAATTAATTTGCTTTTTCCCCTGTCAGTATAAAAAAATTTTCCGCAGGATATAGAAAAAAAAGAAATGAAATTATAGTAGCGGTTATTTCCGTGGGGTGCTTTTTTACACCTGTACATCTTTTCCCTCCGTACATTTTTTTTATTTTTTTTTTTGGTTTTTTTTTTTCGATATTTTTCCCTCCGAAACTAGTTAGCACAATAATGCTGACTAAGGAAACTTTTCATCTCAGAATTGATGGTCAGTTTGGTTTCTCTAGAGAATAGTTTATAAAAAGATGTTGATGTGGAGCAACCATTTATACATCCTTTCCGCAAGTGCTTTTG…
RPL15A_Mut1	YLR075W	TATA	TCACTTGTCTGTGTGTTTAACTGCCTTTCAATTCACCTCATCTCATCTCCCGCTACTTTCCATATATAAAAGCAAAATTAATTTGCTTTTTCCCCTGTCAGTATAAAAAAATTTTCCGCAGGATATAGAAAAAAAAGAAATGAAATTATAGTAGCGGTTATTTCCGTGGGGTGCTTTTTTACACCTGTACATCTTTTCCCTCCGTACATTTTTTTTATTTTTTTTTTTGGTTTTTTTTTTTTCGATATTTTTCCCTCCGAAACTAGTTAGCACAATAATGCTGACTAAGGAAACTTTTCATCTCAGAATTGATGGTCAGTTTGGTTTCTCTAGAGAATAGTTAATTAAAAGATGTTGATGTGGAGCAACCATTTATACATCCTTTCCGCAAGTGCTTTT…
RPL15A_Mut2	YLR075W	Nucleosome_Disfavoring_Sequence	TCACTTGTCTGTGTGTTTAACTGCCTTTCAATTCACCTCATCTCATCTCCCGCTACTTTCCATATATAAAAGCAAAATTAATTTGCTTTTTCCCCTGTCAGTATAAAAAAATTTTCCGCAGGATATAGAAAAAAAAGAAATGAAATTATAGTAGCGGTTATTTCCGTGGGGTGCTTTTTTACACCTGTACATCTTTTCCCTCCGTACATTTGTGTGCTGCCGTCTTTCGGGTCTTTTCCGCGATATTTTTCCCTCCGAAACTAGTTAGCACAATAATGCTGACTAAGGAAACTTTTCATCTCAGAATTGATGGTCAGTTTGGTTTCTCTAGAGAATAGTTTATAAAAAGATGTTGATGTGGAGCAACCATTTATACATCCTTTCCGCAAGTGCTTTTGG…
RPL3_Mut1	YOR063W	Fhl1	AGAGTCTTGGAGATTTTCGACCTGTTCAGACTGGCCAAAAGAGTGCTAATATGAAAATGTTCCCTCTTATAATATATAACATCTGTGACAAAAATCTATTCTTCCACCTATCGCCTGCATAACATGAGGCCTTTCCTGCGGGATAGCTTTTGCTTCAGGTTCTTCTGAGGTTCTGAAAATCAATATATTTTTCCGACAATTTCTCACTATGCCTCTATCCCCCTTAAAAAGAAACACTTTCTACCCTCTTTTCTAAACTCTGCACACTAGACCGAGACAGCAAATCGGAGCCCGAGAGAAAATCCGGAGGACGGAAAAACTAGAAGTAATCTTATGCGGGGAGCATGCACCAGAACGCCCAGAAAACGTGAATGACACTACATACTTTGATACGGATGT…
RPL3_Mut2	YOR063W	Sfp1	AGAGTCTTGGAGATTTTCGACCTGTTCAGACTGGCCAAAAGAGTGCTAATATGAAAATGTTCCCTCTTATAATATATAACATCTGTGACAAAAATCTATTCTTCCACCTATCGCCTGCATAACATGAGGCCTTTCCTGCGGGATAGCTTTTGCTTCAGGTTCTTCTGAGGTTCTGAAAATCAATATATTTTTCCGACAATTTCTCACTATGCCTCTATCCCCCTTAAAAAGAAACACTTTCTACCCTCTTTTCTAAACTCTGCACACTAGACCGAGACAGCAAATCGGAGCCCGAGAGAAAATCCGGAGGACGGAAAAACTAGAAGTAATCTTATGCGGGGAGCATGCACCAGAACGCCCAGAAAACGTGAATGACACTACATACTTTGATACGGATGT…
RPL3_Mut3	YOR063W	TATA	AGAGTCTTGGAGATTTTCGACCTGTTCAGACTGGCCAAAAGAGTGCTAATATGAAAATGTTCCCTCTTATAATATATAACATCTGTGACAAAAATCTATTCTTCCACCTATCGCCTGCATAACATGAGGCCTTTCCTGCGGGATAGCTTTTGCTTCAGGTTCTTCTGAGGTTCTGAAAATCAATATATTTTTCCGACAATTTCTCACTATGCCTCTATCCCCCTTAAAAAGAAACACTTTCTACCCTCTTTTCTAAACTCTGCACACTAGACCGAGACAGCAAATCGGAGCCCGAGAGAAAATCCGGAGGACGGAAAAACTAGAAGTAATCTTATGCGGGGAGCATGCACCAGAACGCCCAGAAAACGTGAATGACACTACATACTTTGATACGGATGT…
RPL3_Mut4	YOR063W	Nucleosome_Disfavoring_Sequence	AGAGTCTTGGAGATTTTCGACCTGTTCAGACTGGCCAAAAGAGTGCTAATATGAAAATGTTCCCTCTTATAATATATAACATCTGTGACAAAAATCTATTCTTCCACCTATCGCCTGCATAACATGAGGCCTTTCCTGCGGGATAGCTTTTGCTTCAGGTTCTTCTGAGGTTCTGAAAATCAATATATTTTTCCGACAATTTCTCACTATGCCTCTATCCCCCTTAAAAAGAAACACTTTCTACCCTCTTTTCTAAACTCTGCACACTAGACCGAGACAGCAAATCGGAGCCCGAGAGAAAATCCGGAGGACGGAAAAACTAGAAGTAATCTTATGCGGGGAGCATGCACCAGAACGCCCAGAAAACGTGAATGACACTACATACTTTGATACGGATGT…
RPL3_Mut5	YOR063W	Random	AGAGTCTTGGAGATTTTCGACCTGTTCAGACTGGCCAAAAGAGTGCTAATATGAAAATGTTCCCTCTTATAATATATAACATCTGTGACAAAAATCTATTCTTCCACCTATCGCCTGCATAACATGAGGCCTTTCCTGCGGGATAGCTTTTGCTTCAGGTTCTTCTGAGGTTCTGAAAATCAATATATTTTTCCGACAATTTCTCACTATGCCTCTATCCCCCTTAAAAAGAAACACTTTCTACCCTCTTTTCTAAACTCTGCACACTAGACCGAGACAGCAAATCGGAGCCCGAGAGAAAATCCGGAGGACGGAAAAACTAGAAGTAATCTTATGCGGGGAGCATGCACCAGAACGCCCAGAAAACGTGAATGACACTACATACTTTGATACGGATGT…
RPL36B_Mut1	YPL249C-A	Random	TGTATAGTTTTGCGCTGTGTGCACATTGTGTGCCTCTCCAATTTGTGTTAAAAAATGCATCACGACTCGTTTAGACAATGTTGTTGTTGTTGTTTTTTTTTTGACTGTATTTTCACCCGTACATCCACGGATGTGTTGGGTTTTTGTTTCCGCTTTACCGTGCGGGAGACGACCATGACCGAGAGGTCTGGTTGCGAAAGACGCACATACCGCGTGCGCGGAACTTTTTCATTGGGTTGCCAACCAAGGCTGTTCAGGGAAGCCCGACGAGGGAAGCTAGCATGAATGCACTAGGAGAGAGAGAGAGAGAGGCAGAGGAAGAGGCACATCATTGCATTTCTTGAATATTCGTTTTAATTAGCGTTAAGTCTTAAGTTCGTGTATTACCATAGTCAAAAC…
RPL39_Mut1	YJL189W	Random	ACTAGAACTGAAAGGCCATTAAAAAACCTTACAATTTAAGAATTGAATAGTCGATTAAGATTATTTAGATTGAAATTGACTAACTGCAAACCCATATTCAAGAATTATTTCACATCTTCCAGCGAGTAAACATGCCGCTGGTAATCGCGCGTCCTCAATATTTGAGTTTTTCAAATAGTGAGGTGTGGATGTATAGAGGAATTACACACTTTTAAGTATGTGATGTATGGGCGCACAGTACCAATTTAACTTTTTTTTTTTTCATTTTTTAGCTTGATTTTCAAAAAACTTATGGGCGTTTTAGGCTCCGGCTCAAACTACCACCACCACGCGGCAGGCCGAGGCAAACAGTACGCCTTGGCGGGGACGCCGAAGCGACTCCTTCTGTTCCAAGCTCAA…
RPL39_Mut2	YJL189W	Nucleosome_Disfavoring_Sequence	ACTAGAACTGAAAGGCCATTAAAAAACCTTACAATTTAAGAATTGAATAGTCGATTAAGATTATTTAGATTGAAATTGACTAACTGCAAACCCATATTCAAGAATTATTTCACATCTTCCAGCGAGTAAACATGCCGCTGGTAATCGCGCGTCCTCAATATTTGAGTTTTTCAAATAGTGAGGTGTGGATGTATAGAGGAATTACACACTTTTAAGTATGTGATGTATGGGCGCACAGTACCAATTTAACTTTTTTTTTTTTCATTTTTTAGCTTGATTTTCAAAAAACTTATGGGCGTTTTAGGCTCCGGCTCAAACTACCACCACCACGCGGCAGGCCGAGGCAAACAGTACGCCTTGGCGGGGACGCCGAAGCGACTCCTTCTGTTCCAAGCTCAA…
RPL41B_Mut1	YDL133C-A	Nucleosome_Disfavoring_Sequence	TGTCAGTGTAAAAAAAAAGAACGCCTCAAAAAATGCAAAAAAATATCATTCACTTTCCCTTCTCAGCAATCTCACGGTTTCGAAATAGCAATCAAAGTATTTTTATAATTGACTAAACAAAAGGTGGTTGGAGACTTTGTGTTGTAGCTTAGAATTTCTTCCACTATATGAAAGCCAAGACCTCTTCTCCTCTTTCGACACTTCGTTTATTTCCACTTTCCCTTATTTAGTATTCATCGTTCAGAATGCTTTCTTTATTTCACGACGGTTACCACACCCGTACACCCTTATCTCATTTCACCAGTACCTTTCCTTATTAGATTCATCTTATTTTATTTTAGGATTTTTAGGTCATTGTACGACGCGTGTCGCACCATGGAAAAGGTGTCGCAGCTGCGA…
RPL4A_Mut1	YBR031W	Fhl1	ATAATATTGAATATGCACTTTTACTATATTAATATACGTCACACGTGGCACAGTGAGAAGTGAAAAATTTTTTTTCAATCTGAAAAAAAAAAAAAAAAAAAAAAAAATTTATATAAACGAATGGTATCTCCATCACATTTCTTTTAGCCTCGCAACTTGTACTTTTCATCACTTTTCTTGTAATTTAGCAATATCCCAAGAACAATCATCGAA
RPL4A_Mut2	YBR031W	Sfp1	ATAATATTGAATATGCACTTTTACTATATTAATATCACGTCACACGACGCACAGTGAGAAGTGAATAATTATTTTTCAATCTGAAAAAAAAAAAAAAAAAAAAAAAAATTTATATAAACGAATGGTATCTCCATCACATTTCTTTTAGCCTCGCAACTTGTACTTTTCATCACTTTTCTTGTAATTTAGCAATATCCCAAGAACAATCATCGAA
RPL4A_Mut3	YBR031W	TATA	ATAATATTGAATATGCACTTTTACTATATTAATATACGTCACACGTGGCACAGGTGAGAAGTGAAAAATTTTTTTTCAATCTGAAAAAAAAAAAAAAAAAAAAAAAATTATATAAACGAATGGTATCTCCATCACATTTCTTTTAGCCTCGCAACTTGTACTTTTCATCACTTTTCTTGTAATTTAGCAATATCCCAAGAACAATCATCGAA
RPL4A_Mut4	YBR031W	Random	ATAATATTGAATATGCACTTTTACTATATTAATATCACGTCACACGACGCACAGTGAGAAGTGAATAATTATTTTTCAATCTGAAAAAAAAAAAAAAAAAAAAAAAAATTTATATAAACGAATGGTATCTCCATCACATTTCTTTTAGCCTCGCAACTTGTACTTTTCATCACTTTTCTTGTAATTTAGCAATATCCCAAGAACAATCATCGAA
RPL4A_Mut5	YBR031W	Random	ATAATATTGAATATGCACTTTTACTATATTAATATCACGTCACACGACGCACAGTGAGAAGTGAAAAATTTTTTTTCAATCTGAAAAAAAAAAAAAAAAAAAAAAAAAAAAATTATATAAACGAATGGTATCTCCATCACATTTCTTTTAGCCTCGCAACTTGTACTTTTCATCACTTTTCTTGTAATTTAGCAATATCCCAAGAACAATCATCGAA
RPL4A_Mut6	YBR031W	Random	ATAATATTGAATATGCACTTTTACTATATTAATATCACGTCACACGACGCACAGTGAGAAGTGAAAAATTTTTTTTCAATCTGAAAAAAAAAAAAAAAAAAAAAAATTAAATTAAACGAATGGTATCTCCATCACATTTCTTTTAGCCTCGCAACTTGTACTTTTCATCACTTTTCTTGTAATTTAGCAATATCCCAAGAACAATCATCGAA
RPL7B_Mut1	YPL198W	TATA	AAGTGCGGCGCTTTAGCTTCAAACTGACTCATGGTTGCGTAAAAACATGGTTGCTTTTTGTCGTTTTCCTCGAAAGGCTTTACCTTTTCATTAAGCCGCTCCATTTTAAAATGTTTTAATAAATCCACTTTTTTCCGGCGCATAATGGATCCAGAAAGGAACTGGCAACTAAATCCGTACATTTCTGAAATTATTTCAGTTCGCAGATTATTTTCTCAGTTTTACCGTATATTCTTATGTATTACAGTTGAGGTACCCACACGCGCACTTGAAAAGAAATTAAAAGTGAAATATTTCAGAGCTCTTCCTATTGCCTTTTCAATAGAGGCTTAAATCTTCCTCGTTTGTAGAGTAAGTAGACCCATATTACAAATCTCCATCAACGTCATA
RPL7B_Mut2	YPL198W	Nucleosome_Disfavoring_Sequence	AAGTGCGGCGCTTTAGCTTCAAACTGACTCATGGTTGCGTAAAAACATGGTTGCTTTTTGTCGTTTTCCTCGAAAGGCTTTACCTTTTCATTAAGCCGCTCCATTTTAAAATGTTTTAATAAATCCACTTTTTTCCGGCGCATAATGGATCCAGAAAGGAACTGGCAACTAAATCCGTACATTTCTGAAATTATTTCAGTTCGCAGACGCGTCGCGCCGGTTTACCGCCGCCTCTTGGGTATTACAGTTGAGGTACCCACACGCGCACTTGAAAAGTATATAAAAGTGAAATATTTCAGAGCTCTTCCTATTGCTTTTTCAATAGAGGCTTAAATCTTCCTCGTTTGTAGAGTAAGTAGACCCATATTACAAATCTCCATCAACGTCATA
RPL8A_Mut1	YHL033C	Random	ACATAAATAATTTCTATTAACAATGTAATTTCCATAATTTTATATTCCTCTCCACCTTCTATTGCATCATGTACTATTCAAATGACTGTAACACTAGTATTATGAAGAAAACACCCAAACATATCTAGGCCATCAGATTTTTTTTTTTTTTCATTTTTCATTTTTTTCTCATTTTCTTATTTATTTTTATTGAAAAATAATAACCGACGCAAACAAATTGGAAAAACCAACGCAAAAAAAAAAAGACGCTAAATTGTTTATAAAGGCGAGGAATTTGTATCTATCAATTACTATTCCAGTTGTCAGTTTACATTGCTTACCCTCTATTATCACATCAAAACAACTAATTCGAA
RPL8A_Mut2	YHL033C	Fhl1	ACATAAATAATTTCTATTAACAATGTAATTTCCATAATTTTATATTCCTCTCCACCTTCTATTGCATCATGTACTATTCAAATGACTGTAACACTAGTATTATGAAGAAAACACCCAAACATATCTAGGCCATCAGATTTTTTTTTTTTCATTTTTCATTTTTTTCTCATTTTCTTATTTATTTTTATTGAAAAATAATAACCGACGCAAACAAATTGGAAAAACCATGGCAAAAAAAAAAAGACGCTAAATTGTTTATAAAGGCGAGGAATTTGTATCTATCAATTACTATTCCAGTTGTCAGTTTACATTGCTTACCCTCTATTATCACATCAAAACAACTAATTCGAA
RPL8A_Mut3	YHL033C	Nucleosome_Disfavoring_Sequence	ACATAAATAATTTCTATTAACAATGTAATTTCCATAATTTTATATTCCTCTCCACCTTCTATTGCATCATGTACTATTCAAATGACTGTAACACTAGTATTATGAAGAAAACACCCAAACATATCTAGGCCATCAGATTTTTTTTTTTCATTTTTCATCTCGTCCTCCTCGTCCGATGCATGTGCGGTGAAAAATAATAACCGACGCAAACAAATTGGAAAAACCAACGCAAAAAAAAAGACGCTAAATTGTTTATAAAGGCGAGGAATTTGTATCTATCAATTACTATTCCAGTTGTCAGTTTACATTGCTTACCCTCTATTATCACATCAAAACAACTAATTCGAA
RPP1B_Mut1	YDL130W	Fhl1	TGGTCATTGTTAAGGCTAAAGGTTCTGCAGACACGTTTTGTACGTAGAAAGAAGCAATCATGCCAAATCAAAATTAGGAAATGAACATCAGTGGTATTTTATAAGCCTGCACATTATATATAGTATATACGTCACGAATACAGGAACACCGTCAGTTAGAGAAACGTCGCCTCAGTTTGCTCCTCAGATATTCCTTTAAACCCATACATATCTTACACAAAACATCCGTACATCAGAAGGATTATATGAATGGCAAAAAAAAATAAAATTTTCATTTCTGCGTGTCGCGCGAAGGAGAAATCTTAGAATTGAAACTTCCGGCTAACGGTTGCTAAAACTAGTTTCCAATGTAATACCAAATAAGCATTTGATGTTGAATCTGTAAGCCCCTTCGTGATA…
RPS12_Mut1	YOR369C	Random	TTTTTCCCTCAGGAAACGGTGATTAATGTCTTCTTACAAGTTAATGAATAGTATATATATGTAAAAAAAAATTCTGCTTCATGTATATACGCACCTCGTTATTGAGGTATTGCGAATGTAGCAGTTGAATAAGCAAAGACGAGGTTTGTACATCTTGGCATATTAAATGGTTATTTCGGGGTTTGTTTCGGCTCAACGGTGATATAAAAAGAAATCCAGTACTGTTTACCATTGTGCATCCGTACATTTGATTTGTTTACAACATCTTCACATTTCCATTGTGGAATCATTTTATTTTTTTCAGAATACCTTACCCGCAAGCAAACTTTCAAGCAAACTTACAATTTGCAAAATTTCATCGAATTCTCCGCAGGACATATTATAAAAGTTATGTCATCT…
RPS14B_Mut1	YJL191W	Sfp1	CGTCACACTGCTCTTTCACTTGTTGATCAAATTTACTTTGATGATATTTAATGGCTTGACAAATTCGTTCATCTTAATTTCATACATAATTTCATCCTGAAATCCTCGATCATTTTCGAGACTGTTTTTCGAGCTTGATTTTATATGTGGTGTAAACACATCATTGTACATCCTTGCACCACACTGAAAAGAATATGGAATTAATTTCAAACTTTTTAATGGGTGATAGACTTGAAAAACAAAACGGAATAAAAGATATAGTCGCAAGAACTTGCCTTCTACGAGTATAAAAGCGGTACTATTCCTTCTGTATGCATCTTCATCGCAAGAGAGAAAAAGACTGAAATCAACAACTCCCAATAACAATTAAGA
RPS20_Mut1	YHL015W	Nucleosome_Disfavoring_Sequence	GCGCCAAATCTGCACCTTGTGCATTTTGTTCACACATTCTTGGCGCTCCTAACTGGAGAAACGTCTATCATTGAGGATAACTCCGGATAGTCGCATTCTGATTGAATAGCCGTCTAGCTCCCTATTGTGACTAGAATACTATTGACATCGTTTTCTCATCAAAACCTCCCGATAAAGGGAAAAAAAGAATTATCTGACCAGATCATTCGGAAAAATGCGTATCGTCATTGATATCCTTCTTGTCTTGTCTGCTGCTAACACTATTTACTATGGAAAGAGAGATTTCCCTGAAACTTCTTATTTTTATCTCTATAGAAGGGGAAAAGATAAAAGTAAAAATGTAAAAATGTTTACCTGCAAGTTCACACCTGTACATTTTCTACATCCGTAAACATAAGA…
RPS9A_Mut1	YPL081W	Nucleosome_Disfavoring_Sequence	TGAGGTGCTGTGTGTGTTGTGATACTTTTGTTCGTTAATATTGGAATACGATCGCTACTTATATTTTATGTTCTGAAGGACTCTAAAAGCAAATCAAAATAACCGCCGAGCTGTGTGTTCAGAGCTATAATAGCAGAATGGTGGTTTTTTTCTGAGCGCAATAGAAAATGGCGCGCAAACCGCCAAGGGAACGGAATTGGTGGAAATCATAAGCTTTTATATCAAGTGCAGCGGCCGGCGAGTGGGACGTGCTTTTTTTACTTTTGGGTTTTTGCGATGAGGCGGTAGACGCGTTGTCTTTGCGCCTGGGGCCCGCCGTCCAACGTGCGGGTACCGTACCCTGCAGTGTTGCAATCGTGTACTTGCCTTATAGTGTCAGCTATTGATCAAGGCCACATG…
